# Supplementary material for: How stable can the pentanitrogen cation be in kinetics?
Source: Royal Society of Chemistry journal article supplement (doi:10.1039/d1cc01250a), 2021-01-01
Supplement: d1cc01250a1.pdf [file d1cc01250a1.pdf]

Supporting Information available for

**How stable can the pentanitrogen cation be in  
kinetics?**

Xiao Tian,<sup>a, b</sup> Xiao-xu Bo,<sup>a, b</sup> and Yi-hong Ding <sup>\*b, a</sup>

<sup>a</sup>Institute of Theoretical Chemistry,

Jilin University, Changchun 130023,

People's Republic of China

<sup>b</sup>Key Laboratory of Carbon Materials of Zhejiang Province,

College of Chemistry and Materials Engineering,

Wenzhou University, Wenzhou 325035, P. R. China.

For submission to:

Chemical Communications

## Table of Contents

1. **Table S1** The recomputed details of the **TS01/01** at B3LYP level and **TS01/02** at the MP2 level.
2. **Table S2** Relative energies (kcal/mol) of **01**, **TS01/P1**, **T01/01**, **TS'01/01**, **T01/02**, **TS01/P2** and the corresponding decomposition products **P1** **02** and **P2**.
3. **Fig. S1** The potential energy surface of V-shaped isomer  $N_5^+(\mathbf{01})$  at the B3LYP/6-31G(d) level.
4. **Fig. S2** The potential energy surface of V-shaped isomer  $N_5^+(\mathbf{01})$  at the MP2/6-311+G(d) level.
5. **Fig. S3** The potential energy surface of V-shaped isomer  $N_5^+(\mathbf{01})$  at the MP2/cc-pVTZ level.
6. **Fig. S4** The potential energy surface of V-shaped isomer  $N_5^+(\mathbf{01})$  at the CBS-QB3 level.
7. **Fig. S5** The potential energy surface of V-shaped isomer  $N_5^+(\mathbf{01})$  at the CCSD/cc-pVTZ level.
8. **Fig. S6** The intrinsic reaction coordinate (IRC) connection of transition states **TS01/P1**(A), **TS01/01**(B), **TS'01/01**(C), **TS01/02**(D) and **TS01/P2**(E) at the B3LYP/6-31G(d) level.
9. **Fig. S7** The intrinsic reaction coordinate (IRC) connection of transition states **TS01/P1**(A), **TS'01/01**(B), **TS01/02** (C) at the MP2/6-311+G(d) level.
10. **Fig. S8** The intrinsic reaction coordinate (IRC) connection of transition states **TS01/P1** at the MP2/cc-pVTZ level.
11. **Table S3** The energy barrier ( $\Delta E^b$ ) (kcal/mol) of  $N_2$ -extrusion for the  $N_3^-$ ,  $N_5^-$ ,  $N_5^+$  at the CBS-QB3 level and the average decomposition temperature of the corresponding salt has been reported ( $\Delta T$ ) ( $^{\circ}C$ ).
12. **Table S4** Cartesian coordinates of the optimized isomeric structures and transitional structures at MP2/cc-pVTZ, CBS-QB3 and CCSD/cc-pVTZ level.
13. **Fig. S9** The videos of the intrinsic reaction coordinate (IRC) connection for the transition states (A) **TS01/P1**, (B)**TS01/01**, (C)**TS'01/01**, (D) **TS01/02** and (E)**TS01/P2** at the B3LYP/6-31G(d) level (see another file named Supporting Information-video).
14. **Fig. S10** The videos of the intrinsic reaction coordinate (IRC) connection for the transition states (A) **TS01/P1**, (B)**TS'01/01** and (C) **TS01/02** at the MP2/6-311+G(d) level (see another file named Supporting Information-video).
15. **Fig. S11** The videos of the intrinsic reaction coordinate (IRC) connection for the transition states **TS01/P1** at the MP2/cc-pVTZ level (see another file named Supporting Information-video).

**Table S1** The imaginary frequency  $M_{\text{freq}}$  in ( $\text{cm}^{-1}$ ) and the decomposition barrier  $\Delta E^b$  in (kcal/mol) of **TS01/01** (at B3LYP level) and **TS01/02**(at MP2 level) , including zero-point energy corrections (ZPVE) were calculated at different calculation levels. a is from the *Ref.* 1.

|                                  | <b>TS01/01</b>                     |                                   | <b>TS01/02</b>                     |                                   |
|----------------------------------|------------------------------------|-----------------------------------|------------------------------------|-----------------------------------|
|                                  | $M_{\text{freq}}$                  | $\Delta E^b$                      | $M_{\text{freq}}$                  | $\Delta E^b$                      |
| B3LYP/6-31G(d)                   | <b>-204.69</b> (-204) <sup>a</sup> | <b>40.73</b> (40.87) <sup>a</sup> | --                                 | --                                |
| MP2/6-31G(d)                     | --                                 | --                                | <b>-400.11</b>                     | <b>51.76</b> (51.86) <sup>a</sup> |
| MP2/6-311+G(d)                   | --                                 | --                                | <b>-400.55</b> (-400) <sup>a</sup> | <b>52.08</b> (52.10) <sup>a</sup> |
| CCSD(T)/6-31G(d)//MP2/6-311+G(d) | --                                 | --                                | --                                 | <b>40.36</b> (40.39) <sup>a</sup> |

**Table S2** Relative energies (kcal/mo1) of **01**, **TS01/P1**, **T01/01**, **TS'01/01**, **T01/02**, **TS01/P2** and the corresponding decomposition products **P1** **02** and **P2**.

|                                | <b>01</b> | <b>TS01/P1</b> | <b>TS01/01</b> | <b>TS'01/01</b> | <b>TS01/02</b> | <b>TS01/P2</b> | <b>P1</b> | <b>02</b> | <b>P2</b> |
|--------------------------------|-----------|----------------|----------------|-----------------|----------------|----------------|-----------|-----------|-----------|
| B3LYP/6-31G(d)                 | 0.00      | 20.51          | 39.10          | 42.09           | 41.40          | 94.04          | 15.50     | 41.52     | 32.01     |
| MP2/6-311+G(d)                 | 0.00      | 44.63          | NA             | 49.83           | 51.27          | NA             | 35.50     | 42.57     | 24.75     |
| MP2/cc-pVTZ                    | 0.00      | 48.05          | NA             | 54.76           | 51.88          | NA             | 41.86     | 42.96     | 30.07     |
| CBS-QB3                        | 0.00      | 22.01          | 40.77          | 36.96           | 40.37          | 94.94          | 10.18     | 38.85     | 27.65     |
| CCSD/cc-pVTZ                   | 0.00      | 21.33          | 36.11          | 33.65           | 41.53          | NA             | 8.02      | 39.81     | 20.64     |
| CCSD(T)_CBS1//<br>CCSD/cc-pVTZ | 0.00      | 24.63          | 39.27          | 38.34           | 41.11          | NA             | 15.18     | 39.04     | 24.67     |
| CCSD(T)_CBS2//<br>CCSD/cc-pVTZ | 0.00      | 24.42          | 38.97          | 38.13           | 41.32          | NA             | 14.45     | 39.02     | 23.75     |
| UCCSD(T)//<br>aug-cc-pV5Z      | 0.00      | 25.22          | --             | --              | --             | --             | 16.85     | --        | --        |

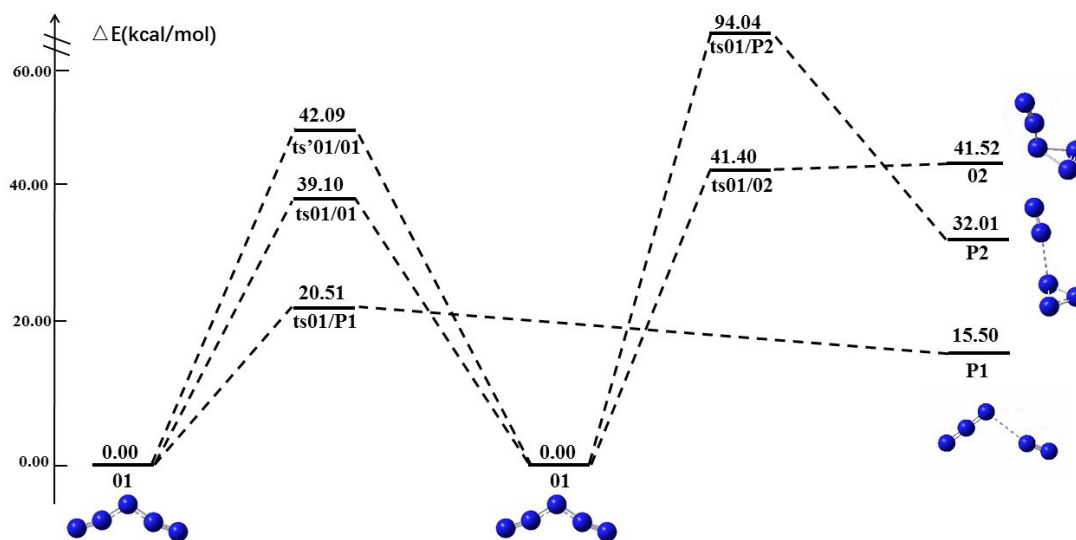

Fig. S1 The potential energy surface of V-shaped isomer  $N_5^+(\mathbf{01})$  at the B3LYP/6-31G(d) level.

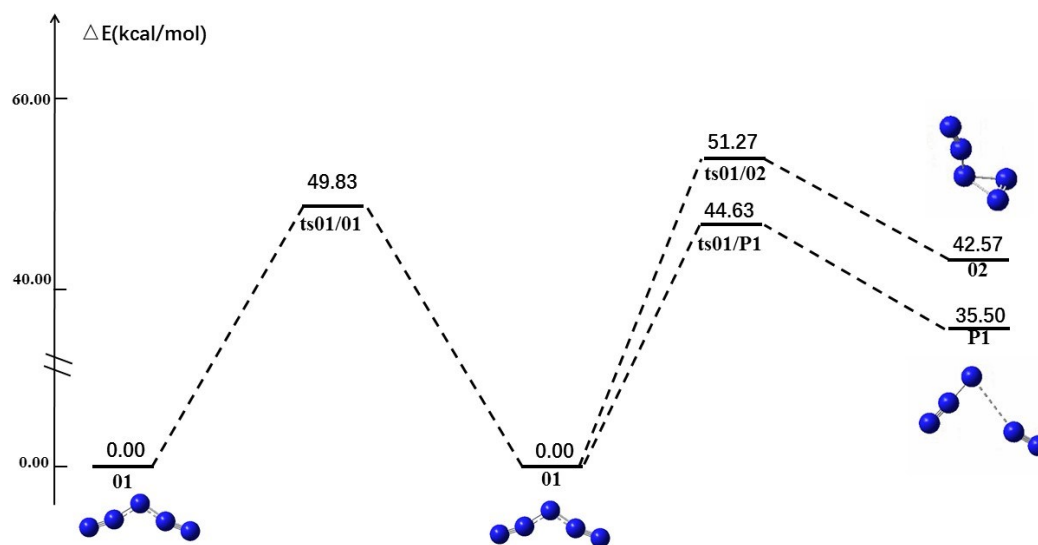

Fig. S2 The potential energy surface of V-shaped isomer  $N_5^+(\mathbf{01})$  at the MP2/6-311+G(d) level.

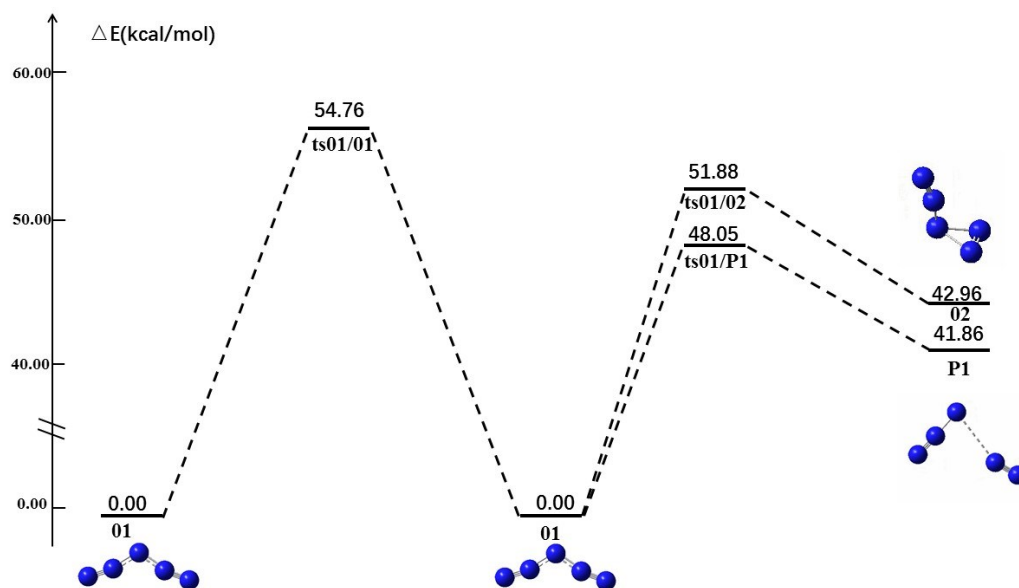

**Fig. S3** The potential energy surface of V-shaped isomer  $N_5^+(01)$  at the MP2/cc-pVTZ level.

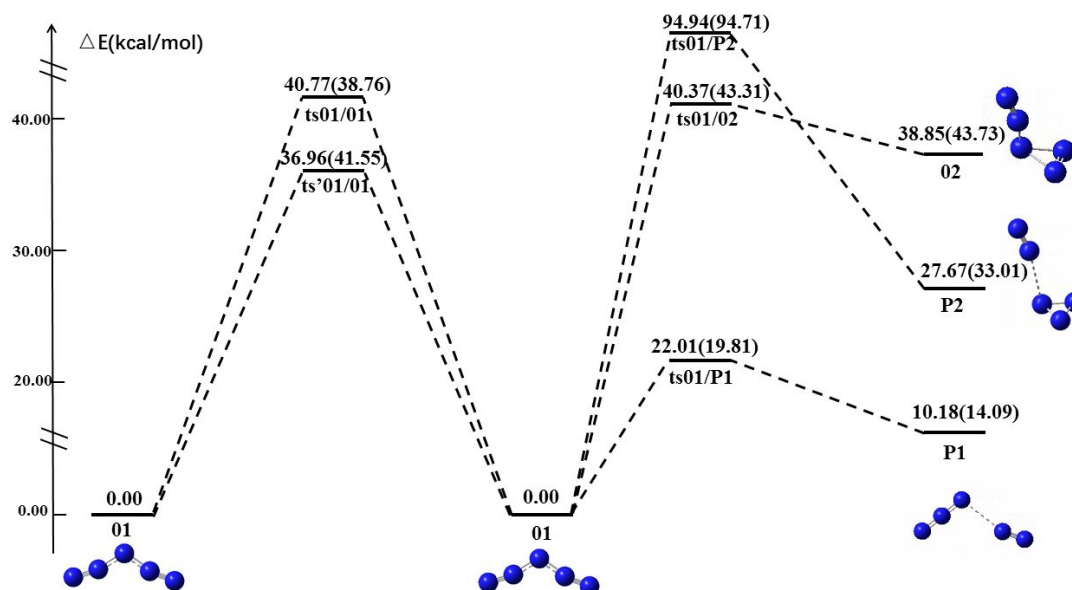

**Fig. S4** The potential energy surface of V-shaped isomer  $N_5^+(01)$  at the CBS-QB3 level. The energy information in brackets is calculated at the B3LYP/6-311G (2d, d, p) level.

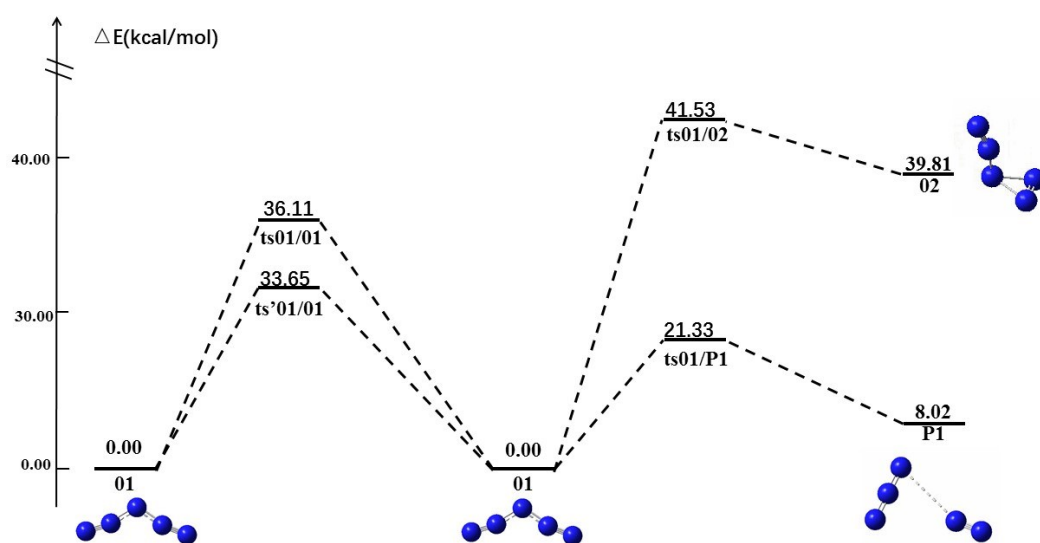

**Fig. S5** The potential energy surface of V-shaped isomer  $\text{N}_5^+(\mathbf{01})$  at the CCSD/cc-pVTZ level.

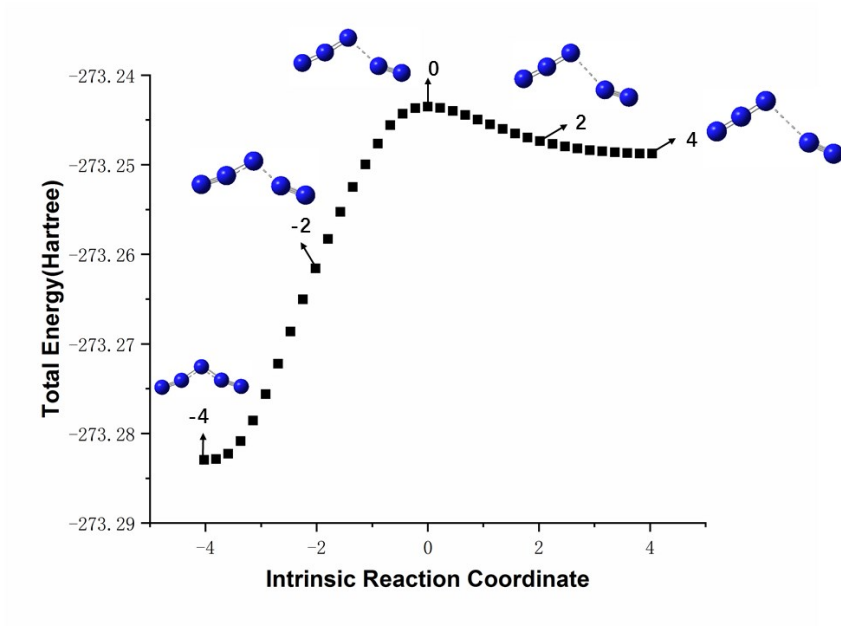

(A) TS01/P1

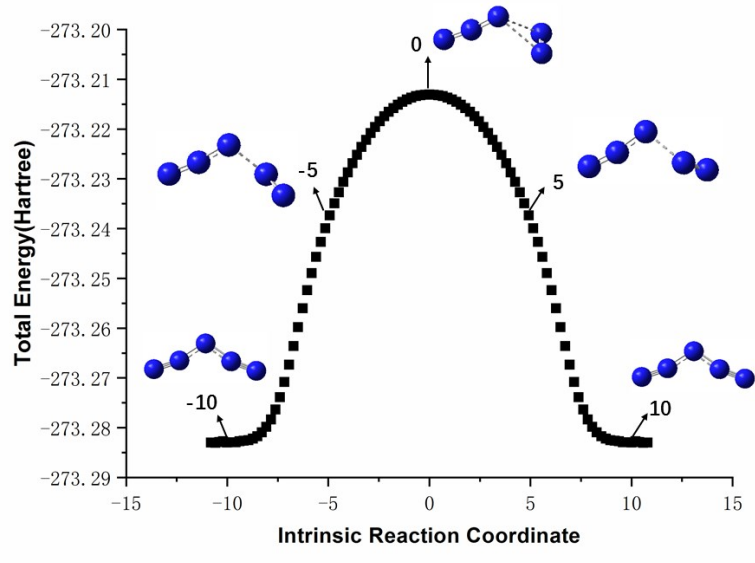

(B) TS01/01

Continued

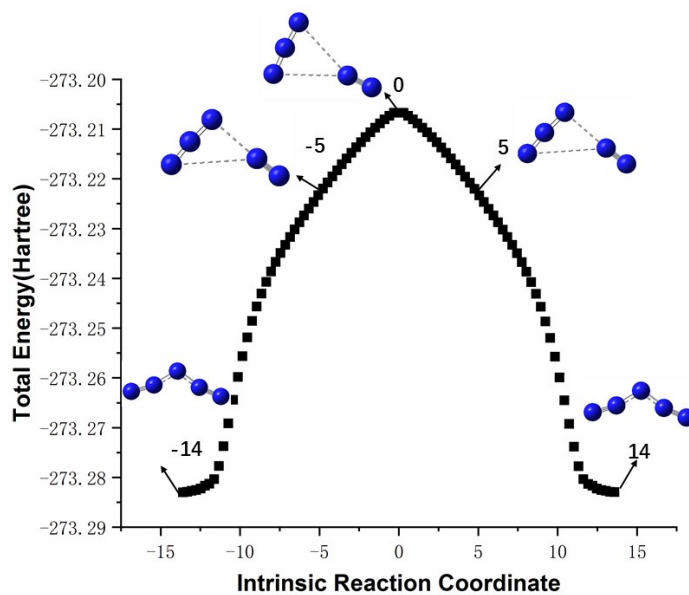

(C) TS'01/01

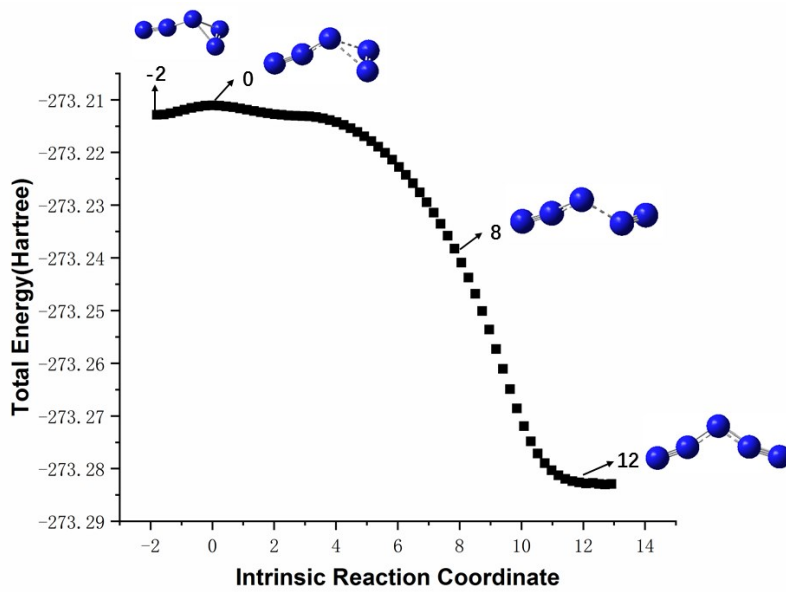

(D) TS01/02

Continued



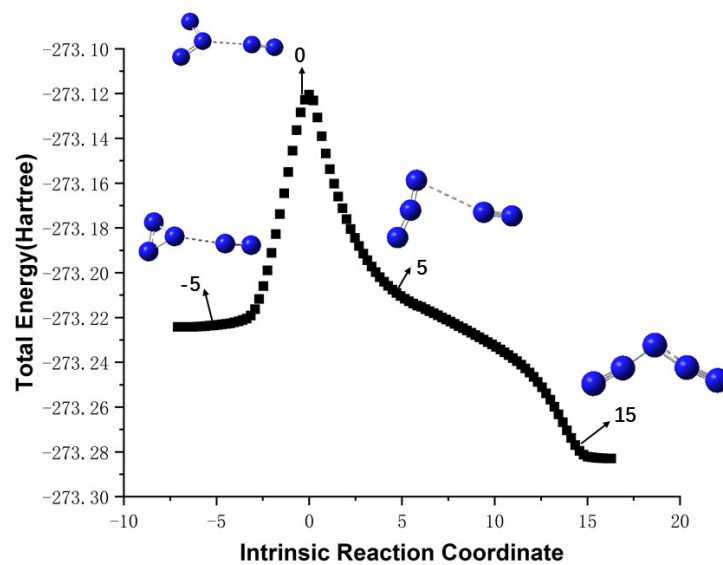

(E) TS01/P2

**Fig. S6** The intrinsic reaction coordinate (IRC) connection of transition states (A) TS01/P1, (B)TS01/01, (C)TS'01/01, (D) TS01/02 and (E)TS01/P2 at the B3LYP/6-31G(d) level.

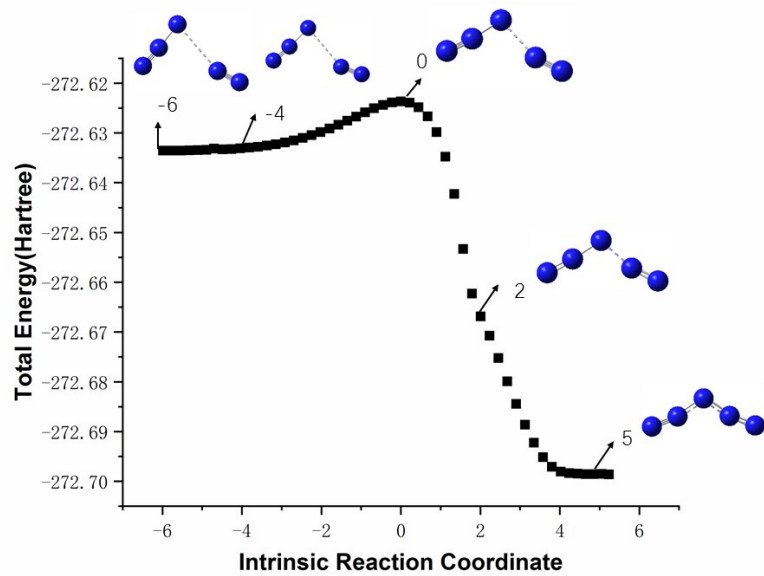

(A) TS01/P1

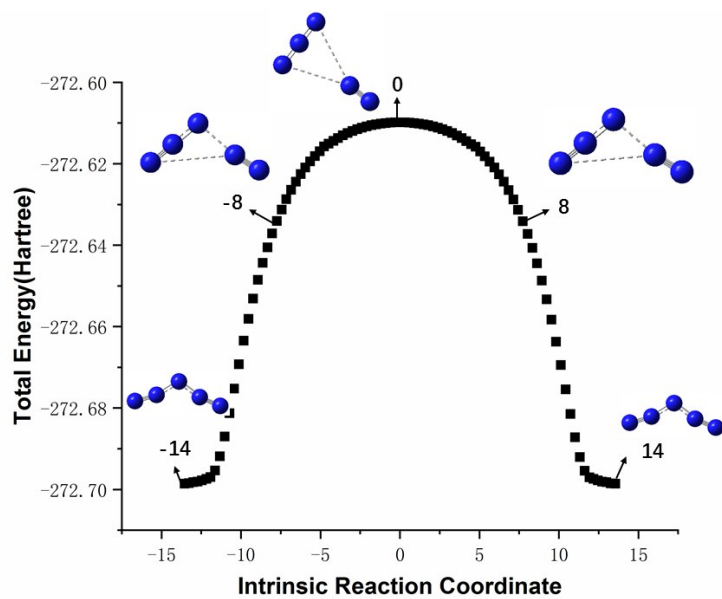

(B) TS'01/01

Continued

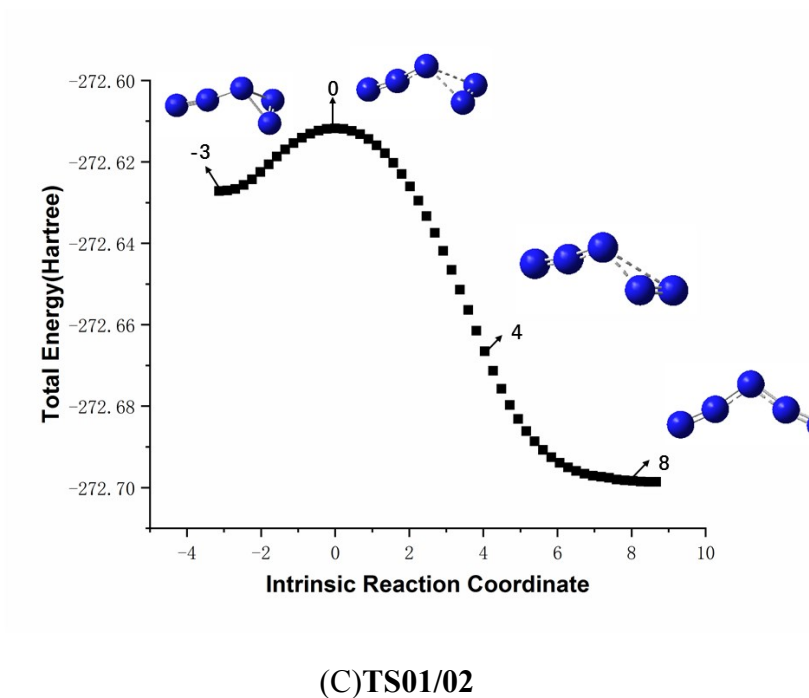

**Fig. S7** The intrinsic reaction coordinate (IRC) connection of transition states (A) **TS01/P1**, (B) **TS'01/01**, (C) **TS01/02** at the MP2/6-311+G(d) level.

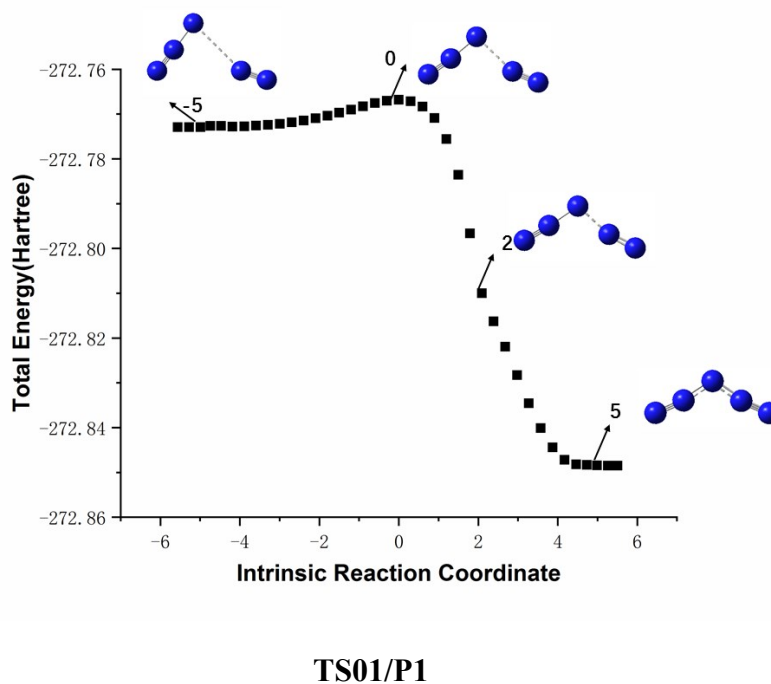

**Fig. S8** The intrinsic reaction coordinate (IRC) connection of transition states **TS01/P1** at the MP2/cc-pVTZ level.

**Table S3** The energy barrier ( $\Delta E^b$ ) (kcal/mol) of  $N_2$ -extrusion for the  $N_3^-$ ,  $N_5^-$ ,  $N_5^+$  at the CBS-QB3 level and the average decomposition temperature of the corresponding salt has been reported ( $\Delta T$ ) ( $^{\circ}C$ ). We have not found the transition state of  $N_3^-$  decomposition into  $N_2$  and  $N^-$  (the open-shell singlet state), but because the decomposition process endothermic 66.68 kcal/mol, the energy barrier should be at least greater than 66.68 kcal/mol. a, b and c are respectively from the Ref. 2, 3 and 4.

|         | $\Delta E^b$ | $\Delta T$          |
|---------|--------------|---------------------|
| $N_3^-$ | >66.68       | (~300) <sup>a</sup> |
| $N_5^-$ | 25.24        | (~100) <sup>b</sup> |
| $N_5^+$ | 22.01        | (<70) <sup>c</sup>  |

## References

1. M. T. Nguyen and T.-K. Ha, *Chem. Phys. Lett.*, 2001, **335**, 311-320.
2. P. Atkins and T. Overton, *Shriver and Atkins' inorganic chemistry*, Oxford University Press, USA, 2010.
3. P. Wang, Y. Xu, Q. Lin and M. Lu, *Chem. Soc. Rev.*, 2018, **47**, 7522-7538.
4. K. O. Christe, *Propellants, Explos., Pyrotech.*, 2007, **32**, 194–204.

**Table S4** Cartesian coordinates of the optimized isomeric structures and transitional structures at MP2/cc-pVTZ, CBS-QB3 and CCSD/cc-pVTZ level.

"mol"----"Stoichiometry"

"lf"----"lowest frequency(cm<sup>-1</sup>)"

"te\_zpe"----"total energy with zero-point energy (a.u.)"

"te\_gfe"----"total energy with Gibbs free energy (a.u.)"

#####

**01** charge=1 spin=1 mol=N5(1+) RMP2-FC/CC-pVTZ

lf=186.4 te\_zpe=-272.828613 te\_gfe=-272.854966

7 -0.000000 2.111253 -0.409924

7 -0.000000 1.070346 0.026953

7 0.000000 0.000000 0.765943

7 -0.000000 -1.070346 0.026953

7 -0.000000 -2.111253 -0.409924

**TS01/P1** charge=1 spin=1 mol=N5(1+) UMP2-FC/CC-pVTZ

lf=-395.4 te\_zpe=-272.750095 te\_gfe=-272.778398

7 2.156073 -0.020063 0.000000

7 1.162125 0.448361 0.000000

7 0.000000 1.130836 0.000000

7 -1.191644 -0.476371 0.000000

7 -2.126554 -1.082763 0.000000

**TS'01/01** charge=1 spin=1 mol=N5(1+) RMP2-FC/CC-pVTZ

lf=-108.8 te\_zpe=-272.738002 te\_gfe=-272.767706

7 1.374575 -0.000002 0.000185

7 -2.610709 0.000056 -0.000015

7 -1.497198 -0.000033 0.000021

7 1.366721 1.179235 -0.000096

7 1.366611 -1.179256 -0.000096

**TS01/02** charge=1 spin=1 mol=N5(1+) RMP2-FC/CC-pVTZ

lf=-427.5 te\_zpe=-272.744645 te\_gfe=-272.772289

7 1.612591 -0.474566 -0.425724

7 1.300658 -0.044956 0.583488

7 0.046130 0.871479 -0.174206

7 -0.980314 0.087116 -0.031864

7 -1.979065 -0.439073 0.048306

**P1** charge=1 spin=1 mol=N5(1+) UMP2-FC/CC-pVTZ

lf=70.0 te\_zpe=-272.757466 te\_gfe=-272.788264

7 -1.034351 1.735131 0.000000

7 0.000000 1.369669 0.000000

7 1.286181 0.944409 0.000000

7 -0.055639 -1.472331 -0.000000

7 -0.196191 -2.576878 -0.000000

**02** charge=1 spin=1 mol=N5(1+) RMP2-FC/CC-pVTZ

lf=222.9 te\_zpe=-272.759427 te\_gfe=-272.786509

7 -1.558050 1.277834 0.000000  
7 -0.584552 0.710950 0.000000  
7 0.714201 0.306306 0.000000  
7 0.714201 -1.147545 0.602932  
7 0.714201 -1.147545 -0.602932

**P2** charge=1 spin=1 mol=N5(1+) RMP2-FC/CC-pVTZ

lf=58.8 te\_zpe=-272.775912 te\_gfe=-272.807042

7 1.351836 0.668249 0.000000  
7 -1.233434 -0.998038 0.666123  
7 -1.233434 -0.998038 -0.666123  
7 -1.233434 0.162850 -0.000000  
7 2.348464 1.164977 0.000000

"mol"----"Stoichiometry"

"lf"----"lowest frequency(cm-1)"

"te\_zpe"----"total energy with zero-point energy (a.u.) at B3LYP/6-311G(2d,d,p) "

"te\_gfe"----"total energy with Gibbs free energy (a.u.) at B3LYP/6-311G(2d,d,p) "

"te\_ms\_zpe"----"total energy with zero-point energy (a.u.) at CBS-QB3"

"te\_ms\_gfe"----"total energy with Gibbs free energy (a.u.) at CBS-QB3"

#####

**01** charge=1 spin=1 mol=N5(1+) CBS-QB3

lf=195.2 te\_zpe=-273.333023 te\_gfe=-273.359307 te\_ms\_zpe=-272.938166  
te\_ms\_gfe= -272.964465

7 -0.000000 1.082950 0.005931  
7 -0.000000 2.128453 -0.370308  
7 0.000000 0.000000 0.728754  
7 -0.000000 -1.082950 0.005931  
7 -0.000000 -2.128453 -0.370308

**TS01/P1** charge=1 spin=1 mol=N5(1+) UCBS-QB3

lf=-423.5 te\_zpe=-273.299415 te\_gfe=-273.327751 te\_ms\_zpe=-272.901034  
te\_ms\_gfe= -272.929393

7 2.231453 0.117739 -0.000000  
7 1.142700 0.437737 -0.000000  
7 0.000000 0.951768 -0.000000  
7 -1.188935 -0.522744 0.000000  
7 -2.185219 -0.984500 0.000000

**TS01/O1** charge=1 spin=1 mol=N5(1+) CBS-QB3

lf=-213.8 te\_zpe=-273.268456 te\_gfe=-273.297539 te\_ms\_zpe=-272.870386  
te\_ms\_gfe= -272.899495

7 -0.677915 -1.593162 0.553824  
7 -0.677915 -1.593162 -0.553824



7 -0.677915 0.673709 0.000000  
7 0.490506 1.020988 0.000000  
7 1.543239 1.491627 0.000000

**TS'01/01** charge=1 spin=1 mol=N5(1+) CBS-QB3

lf=-515.6 te\_zpe=-273.265344 te\_gfe=-273.295065 te\_ms\_zpe=-272.875819  
te\_ms\_gfe= -272.905568

7 1.370839 0.000004 -0.000038  
7 -2.567912 0.000004 0.000007  
7 -1.470700 -0.000015 -0.000010  
7 1.333876 1.179507 0.000021  
7 1.333897 -1.179500 0.000021

**TS01/02** charge=1 spin=1 mol=N5(1+) CBS-QB3

lf=-241.2 te\_zpe=-273.262869 te\_gfe=-273.290304 te\_ms\_zpe=-272.872675  
te\_ms\_gfe= -272.900130

7 1.424844 -0.260732 -0.569368  
7 1.424212 -0.259019 0.570020  
7 0.108948 0.816571 -0.000880  
7 -0.959294 0.055975 -0.000018  
7 -1.998710 -0.352795 0.000245

**TS01/P2** charge=1 spin=1 mol=N5(1+) CBS-QB3

lf=-1591.8 te\_zpe=-273.177871 te\_gfe=-273.208404 te\_ms\_zpe=-272.782603  
te\_ms\_gfe= -272.813170

7 2.638659 -0.073060 -0.047098

7 -0.942825 -0.112463 0.320665

7 1.544321 -0.018808 -0.010631

7 -1.366610 0.983590 -0.097838

7 -1.873545 -0.779259 -0.165098

**P1** charge=1 spin=1 mol=N5(1+) UCBS-QB3

lf=78.5 te\_zpe=-273.306662 te\_gfe=-273.336874 te\_ms\_zpe=-272.917992  
te\_ms\_gfe= -272.948238

7 2.253346 0.485903 0.000000

7 1.139342 0.833384 0.000000

7 0.000000 1.210485 0.000000

7 -1.279203 -0.909359 -0.000000

7 -2.113486 -1.620413 -0.000000

**02** charge=1 spin=1 mol=N5(1+) CBS-QB3

lf=222.7 te\_zpe=-273.262358 te\_gfe=-273.289624 te\_ms\_zpe=-272.875270  
te\_ms\_gfe= -272.902557

7 -1.506413 1.353007 -0.000000

7 -0.585613 0.734842 -0.000000  
7 0.697342 0.317638 -0.000000  
7 0.697342 -1.202744 0.583102  
7 0.697342 -1.202744 -0.583102

**P2** charge=1 spin=1 mol=N5(1+) CBS-QB3

lf=109.4 te\_zpe=-273.276968 te\_gfe=-273.306641 te\_ms\_zpe=-272.890667  
te\_ms\_gfe= -272.920371

7 1.167741 0.860981 0.000000  
7 -1.073655 -1.176963 0.648113  
7 -1.073655 -1.176963 -0.648113  
7 -1.073655 -0.013411 -0.000000  
7 2.053224 1.506357 0.000000

"mol"----"Stoichiometry"

"lf"----"lowest frequency(cm-1)"

"te\_zpe"----"total energy with zero-point energy (a.u.)"

"te\_gfe"----"total energy with Gibbs free energy (a.u.)"

#####

**01** charge=1 spin=1 mol=N5(1+) RCCSD-FC/CC-pVTZ

lf=190.0 te\_zpe=-272.810033 te\_gfe=-272.836388

7 0.000000 1.071585 0.024939  
7 0.000000 2.081064 -0.424595  
7 -0.000000 0.000000 0.799312  
7 -0.000000 -1.071585 0.024939  
7 -0.000000 -2.081064 -0.424595

**TS01/P1** charge=1 spin=1 mol=N5(1+) UCCSD-FC/CC-pVTZ

lf=-559.3 te\_zpe=-272.774011 te\_gfe=-272.802397

7 2.178288 0.041634 0.000000  
7 1.131752 0.452751 0.000000  
7 0.000000 1.039559 0.000000  
7 -1.195953 -0.466769 -0.000000  
7 -2.114086 -1.067174 -0.000000

**TS01/01** charge=1 spin=1 mol=N5(1+) RCCSD-FC/CC-pVTZ

lf=-130.4 te\_zpe=-272.747319 te\_gfe=-272.778690

7 -0.693953 -1.762205 0.549681  
7 -0.693953 -1.762205 -0.549681  
7 -0.693953 0.919172 0.000000  
7 0.474426 1.163004 0.000000  
7 1.607433 1.442234 0.000000

**TS'01/01** charge=1 spin=1 mol=N5(1+) RCCSD-FC/CC-pVTZ

lf=-92.2 te\_zpe=-272.753014 te\_gfe=-272.782762

7 1.389472 0.000087 0.000441  
7 -2.632387 0.000475 0.004487  
7 -1.536047 -0.000946 -0.006168  
7 1.389845 -1.177951 0.000624  
7 1.389118 1.178335 0.000617

**TS01/02** charge=1 spin=1 mol=N5(1+) RCCSD-FC/CC-pVTZ

lf=-217.4 te\_zpe=-272.742290 te\_gfe=-272.770201

7 1.447383 -0.280303 -0.561687  
7 1.447230 -0.280662 0.561631  
7 0.046466 0.906570 0.000240  
7 -0.982050 0.094896 -0.000211  
7 -1.959029 -0.440501 0.000027

**P1** charge=1 spin=1 mol=N5(1+) UCCSD-FC/CC-pVTZ

lf=41.2 te\_zpe=-272.792213 te\_gfe=-272.823601

7 1.181782 1.387608 -0.000000  
7 -0.000000 1.396165 -0.000000  
7 -1.182551 1.396137 -0.000000  
7 0.000655 -1.541879 0.000000  
7 0.000113 -2.638032 0.000000

**02** charge=1 spin=1 mol=N5(1+) RCCSD-FC/CC-pVTZ

lf=221.5 te\_zpe=-272.745829 te\_gfe=-272.772947

7 -1.572790 1.256999 0.000000  
7 -0.614945 0.715702 0.000000  
7 0.729245 0.303305 0.000000  
7 0.729245 -1.138003 0.591504  
7 0.729245 -1.138003 -0.591504

**P2** charge=1 spin=1 mol=N5(1+) RCCSD-FC/CC-pVTZ

lf=32.9 te\_zpe=-272.771589 te\_gfe=-272.803490

7 -1.299222 0.222612 -0.000000  
7 -1.299222 -0.917060 0.654167  
7 -1.299222 -0.917060 -0.654167  
7 2.456606 1.012025 0.000000  
7 1.441061 0.599483 0.000000
